# Supplementary material
Source: Springer Nature journal article supplement (https://www.springermedizin.de/resource/supplementary/12961_2013_287_MOESM1_ESM.pdf/9570966)
Supplement: MOESM1 [file 9570966]

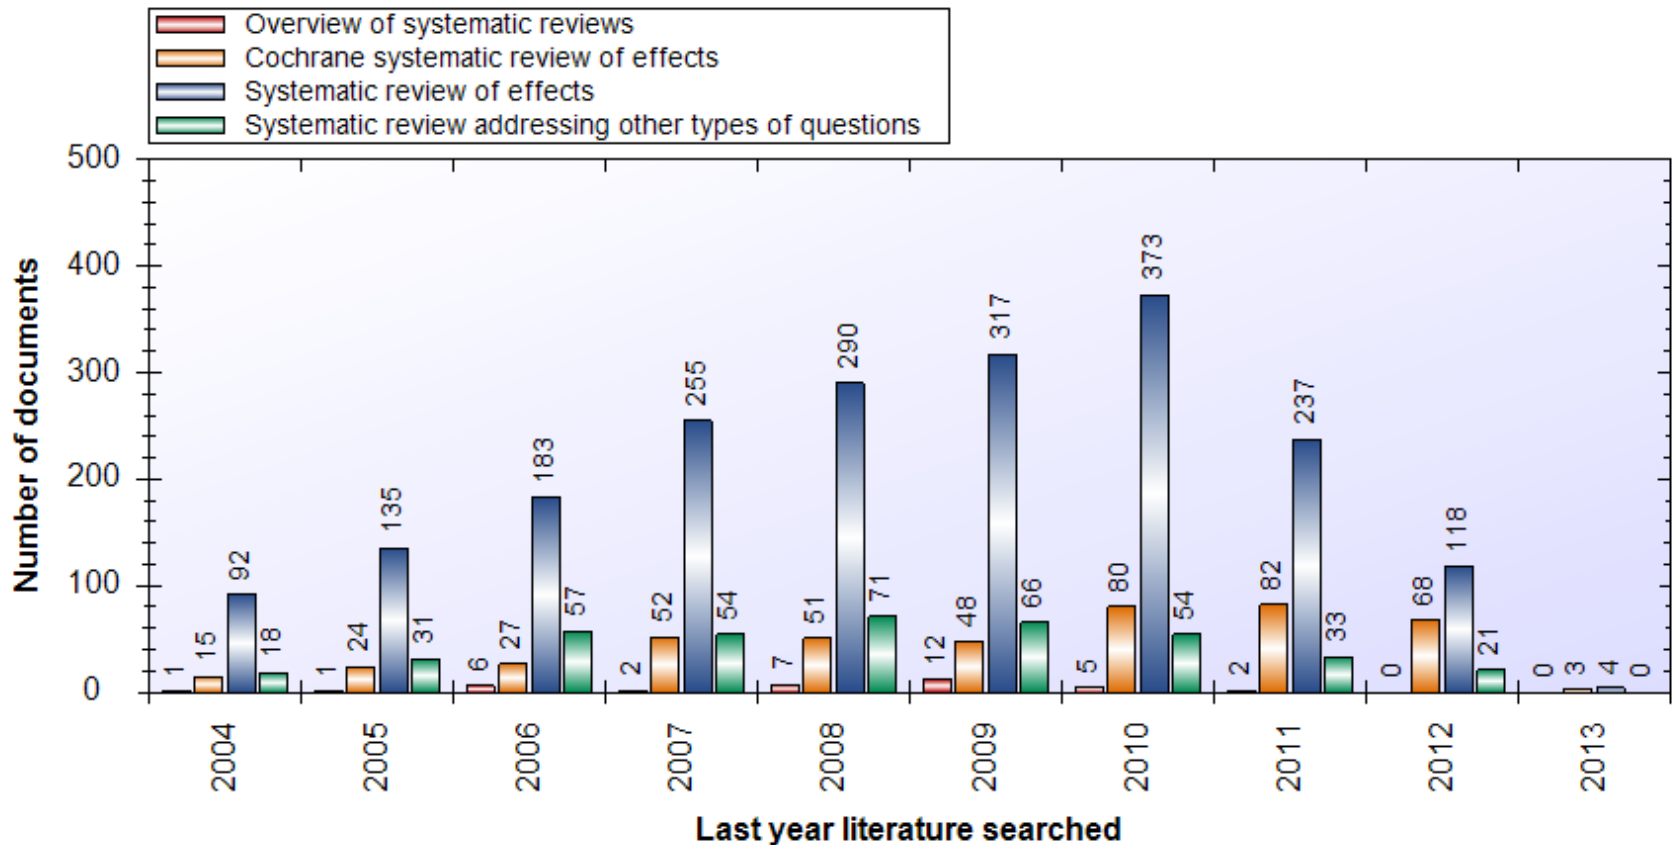

\*Of the 3289 reviews included in HSE, 313 do not report the last year the literature was searched and 34 do not yet have this information coded in HSE
